# Supplementary material for: Validation and real-world clinical application of an artificial intelligence algorithm for breast cancer detection in biopsies
Source: PubMed Central journal article supplement (PMC9723672; doi:10.1038/s41523-022-00496-w), 2022-12-06
Supplement: 41523_2022_496_MOESM1_ESM.pdf [file 41523_2022_496_MOESM1_ESM.pdf]

## SUPPLEMENTARY INFORMATION

### SUPPLEMENTARY TABLES

**Supplementary Table 1** Discrepancies between the study pathologists in the external validation set

| Diagnosis                      | Discrepancies<br>N (%) | Discrepancies details - N                               |
|--------------------------------|------------------------|---------------------------------------------------------|
| Invasive vs. non-invasive      | 11 (7%)                | Invasive vs. benign – 4<br>Invasive vs. DCIS/ADH – 7    |
| IDC vs. ILC vs. other invasive | 7 (4.5%)               | IDC vs. ILC – 5<br>IDC vs. Metaplastic – 2              |
| DCIS/ADH vs. benign            | 14 (10.4%)             | DCIS IG/HG vs. Benign – 9<br>DCIS LG/ADH vs. Benign – 5 |
| DCIS HG/IG vs. LG/ADH          | 25 (18.5%)             | DCIS HG vs. LG/ADH – 10<br>DCIS IG vs. LG/ADH – 15      |

ADH – atypical ductal hyperplasia; DCIS – ductal carcinoma in-situ; HG/IG/LG – high- / intermediate- /low- grade; IC-NST– infiltrating/invasive carcinoma no special type (IDC); ILC – infiltrating/invasive lobular carcinoma.

**Supplementary Table 2.** AI algorithm performance on rare invasive subtypes detection in the external validation set

| Set                                | Analysis                       | Number of cases                             | AUC <sup>a,b</sup><br>[95% CI] | Specificity<br>[95% CI]   | Sensitivity<br>[95% CI]   | PPV<br>NPV     |
|------------------------------------|--------------------------------|---------------------------------------------|--------------------------------|---------------------------|---------------------------|----------------|
| External validation set (IC + MHS) | Rare Invasive vs. non-invasive | 314<br>34 rare invasive<br>280 non-invasive | 0.992<br>[0.985;0.999]         | 94.12%<br>[79.93%;99.35%] | 95.71%<br>[92.58%;97.61%] | 72.7%<br>99.3% |

<sup>a</sup>AUC = area under the ROC curve

<sup>b</sup>The AUC of the precision-recall curve is 0.9434 and the F1 score is 87.5%

**Supplementary Table 3.** AI algorithm performance on H&E- and HES- stained biopsies of the external validation set\*

| Set | Analysis                                 | Number of cases                         | AUC<br>[95% CI]         | Specificity<br>[95% CI]   | Sensitivity<br>[95% CI]    | PPV<br>NPV      |
|-----|------------------------------------------|-----------------------------------------|-------------------------|---------------------------|----------------------------|-----------------|
| H&E | <b>Invasive vs. non-invasive</b>         | 167<br>55 invasive<br>112 non-invasive  | 0.991<br>[0.981;1]      | 93.75%<br>[87.10%;97.50%] | 96.36%<br>[86.40%;100%]    | 88.3%<br>98.1%  |
|     | <b>DCIS vs. benign/other<sup>a</sup></b> | 103<br>50 DCIS<br>53 benign/other       | 0.998<br>[0.994;1]      | 98.1%<br>[88.62%;100%]    | 98%<br>[87.99%;100%]       | 98%<br>98.1%    |
|     | <b>IDC vs. ILC<sup>b,c</sup></b>         | 54<br>37 IDC<br>17 ILC                  | 0.976<br>[0.944;1]      | 94.12%<br>[69.24%;100%]   | 91.9%<br>[76.98%;98.93%]   | 97.1%<br>84.2%  |
|     | <b>DCIS HG/IG vs. LG/ADH<sup>d</sup></b> | 58<br>41 DCIS HG/IG<br>17 DCIS LG/ADH   | 0.937<br>[0.879;0.995]  | 82.35%<br>[55.80%;96.98%] | 82.92%<br>[67.40%;92.86%]  | 91.9%<br>66.7%  |
| HES | <b>Invasive vs. non-invasive</b>         | 269<br>101 DCIS/ADH<br>168 benign/other | 0.989<br>[0.980;1]      | 93.45%<br>[88.29%;96.67%] | 95.05%<br>[88.28%;98.52%]  | 89.7%<br>96.9%  |
|     | <b>DCIS vs. benign/other<sup>a</sup></b> | 145<br>53 DCIS<br>93 benign/other       | 0.960<br>[0.931;0.988]  | 89.13%<br>[80.50%;94.63%] | 88.68%<br>[76.28%;95.85%]  | 82.5%,<br>93.2% |
|     | <b>IDC vs. ILC<sup>b,c</sup></b>         | 99<br>61 IDC<br>38 ILC                  | 0.971<br>[0.938;1]      | 92.11%<br>[77.52%;98.96%] | 91.8%<br>[81.17%;97.48%]   | 94.9%,<br>87.5% |
|     | <b>DCIS HG/IG vs. LG/ADH<sup>d</sup></b> | 76<br>47 DCIS HG/IG<br>29 DCIS LG/ADH   | 0.913<br>[0.852; 0.975] | 82.75%<br>[63.51%;94.34%] | 82.98%<br>[68.65%; 92.32%] | 88.6%<br>75%    |

\*The small differences between the two sets could stem from differences between the scanners and/or between the stains (H&E vs HES) and/or between the labs (different preprocessing of tissue).

<sup>a</sup> Includes only non-invasive cases; <sup>b</sup> Includes only IDC (IC-NST and rare subtypes) and ILC cases, exclude other invasive cases; <sup>c</sup>IDC was considered positive and ILC negative for these analyses; <sup>d</sup>DCIS HG/IG considered positive and DCIS LG/ADH negative for these analyses;

ADH – atypical ductal hyperplasia; AUC – area under the receiver operating characteristic curve; DCIS – ductal carcinoma in-situ; HG/IG/LG – high- / intermediate- /low- grade; IDC – invasive ductal carcinoma; ILC – infiltrating/invasive lobular carcinoma; NPV – negative predicting value; PPV – positive predicting value.

**Supplementary Table 4.** AI algorithm performance on TILs detection in the external validation set

| Set                                | Analysis              | Number of cases                             | AUC<br>[95% CI]        | Specificity<br>[95% CI] | Sensitivity<br>[95% CI] |
|------------------------------------|-----------------------|---------------------------------------------|------------------------|-------------------------|-------------------------|
| External validation set (IC + MHS) | TILs in Invasive+DCIS | 109<br>32 TILs positive<br>77 TILs negative | 0.965<br>[0.934;0.996] | 85.7%<br>[76.3%;92%]    | 93.8%<br>[78.8%;99.3%]  |
|                                    | TILs in Invasive      | 47<br>19 TILs positive<br>28 TILs negative  | 0.953<br>[0.892;1]     | 85.7%<br>[67.9%;94.9%]  | 94.7%<br>[73.5%;99.9%]  |
|                                    | TILs in DCIS          | 62<br>13 TILs positive<br>49 TILs negative  | 0.962<br>[0.920;1]     | 85.7%<br>[73%;93.2%]    | 92.3%<br>[64.6%;100%]   |

**Supplementary Table 5.** Algorithm optimization process

| Architecture            | Inception V1 |       | Inception V3 |       | ResNet 101 |       |
|-------------------------|--------------|-------|--------------|-------|------------|-------|
| Magnification           | 10x          | 2.5x  | 40x          | 5x    | 20x        | 10x   |
| Log loss                | 1.901        | 2.223 | 2.059        | 1.801 | 1.862      | 1.762 |
| Log loss of combination | 1.703        |       | 1.6          |       | 1.651      |       |
| Ensemble log loss       | 1.476        |       |              |       |            |       |

**Supplementary Table 6.** Distribution of cases used for algorithm training

| <b>Diagnosis</b> | <b>Sub-type</b> | <b>Total Cases (Training set)</b> |
|------------------|-----------------|-----------------------------------|
| Benign/Other     |                 | 935                               |
| Invasive         | IDC             | 391                               |
|                  | ILC             | 109                               |
|                  | IDC+ILC         | 35                                |
|                  | Invasive Other  | 42                                |
| DCIS/ADH         | DCIS            | 266                               |
|                  | ADH             | 214                               |
| <b>Total</b>     |                 | <b>1992</b>                       |

DCIS – ductal carcinoma in-situ; ADH – atypical ductal hyperplasia; IDC - includes invasive ductal carcinoma (IC-NST and rare subtypes); ILC – infiltrating/invasive lobular carcinoma.

## SUPPLEMENTARY FIGURES

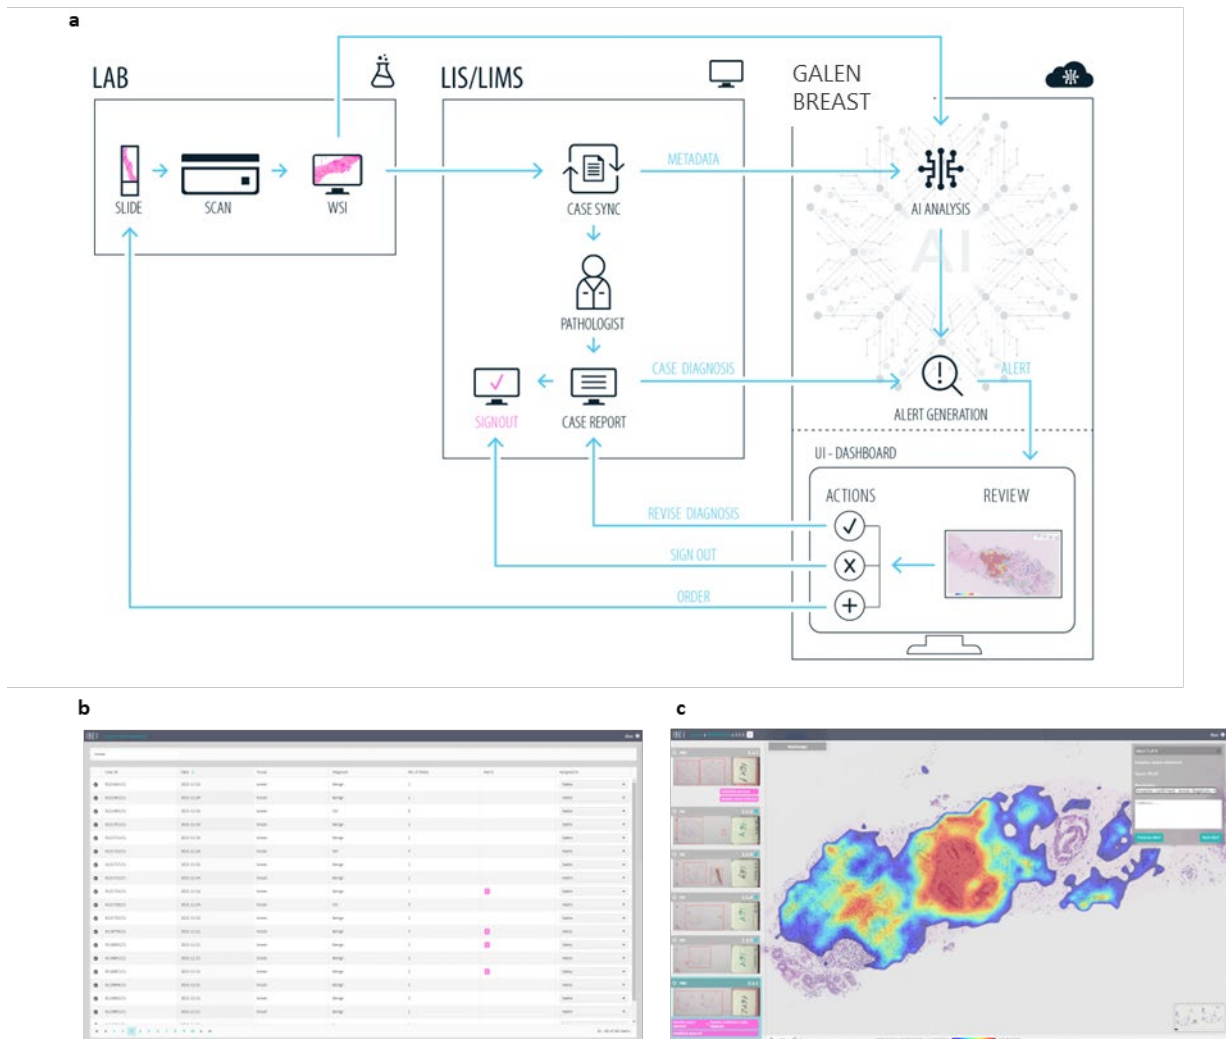

**Supplementary Figure 1.** Pathology workflow with the integrated AI-based Second Read solution.

**a.** The AI algorithm analyzed WSIs that had been diagnosed by pathologists in their routine workflow. The system raised alerts for cases with a potential discrepancy between the pathologist's diagnosis and the algorithmic results on the existence of invasive or in-situ breast cancer. Pathologists used the system's web-based user interface to review the cases;

**b.** Example of a case list with pink-labeled alerts;

**c.** Example of a resolved alert after the pathologist performed a second review, specifically focused on the region that triggered the alert, as highlighted by heatmap in the slide viewer.

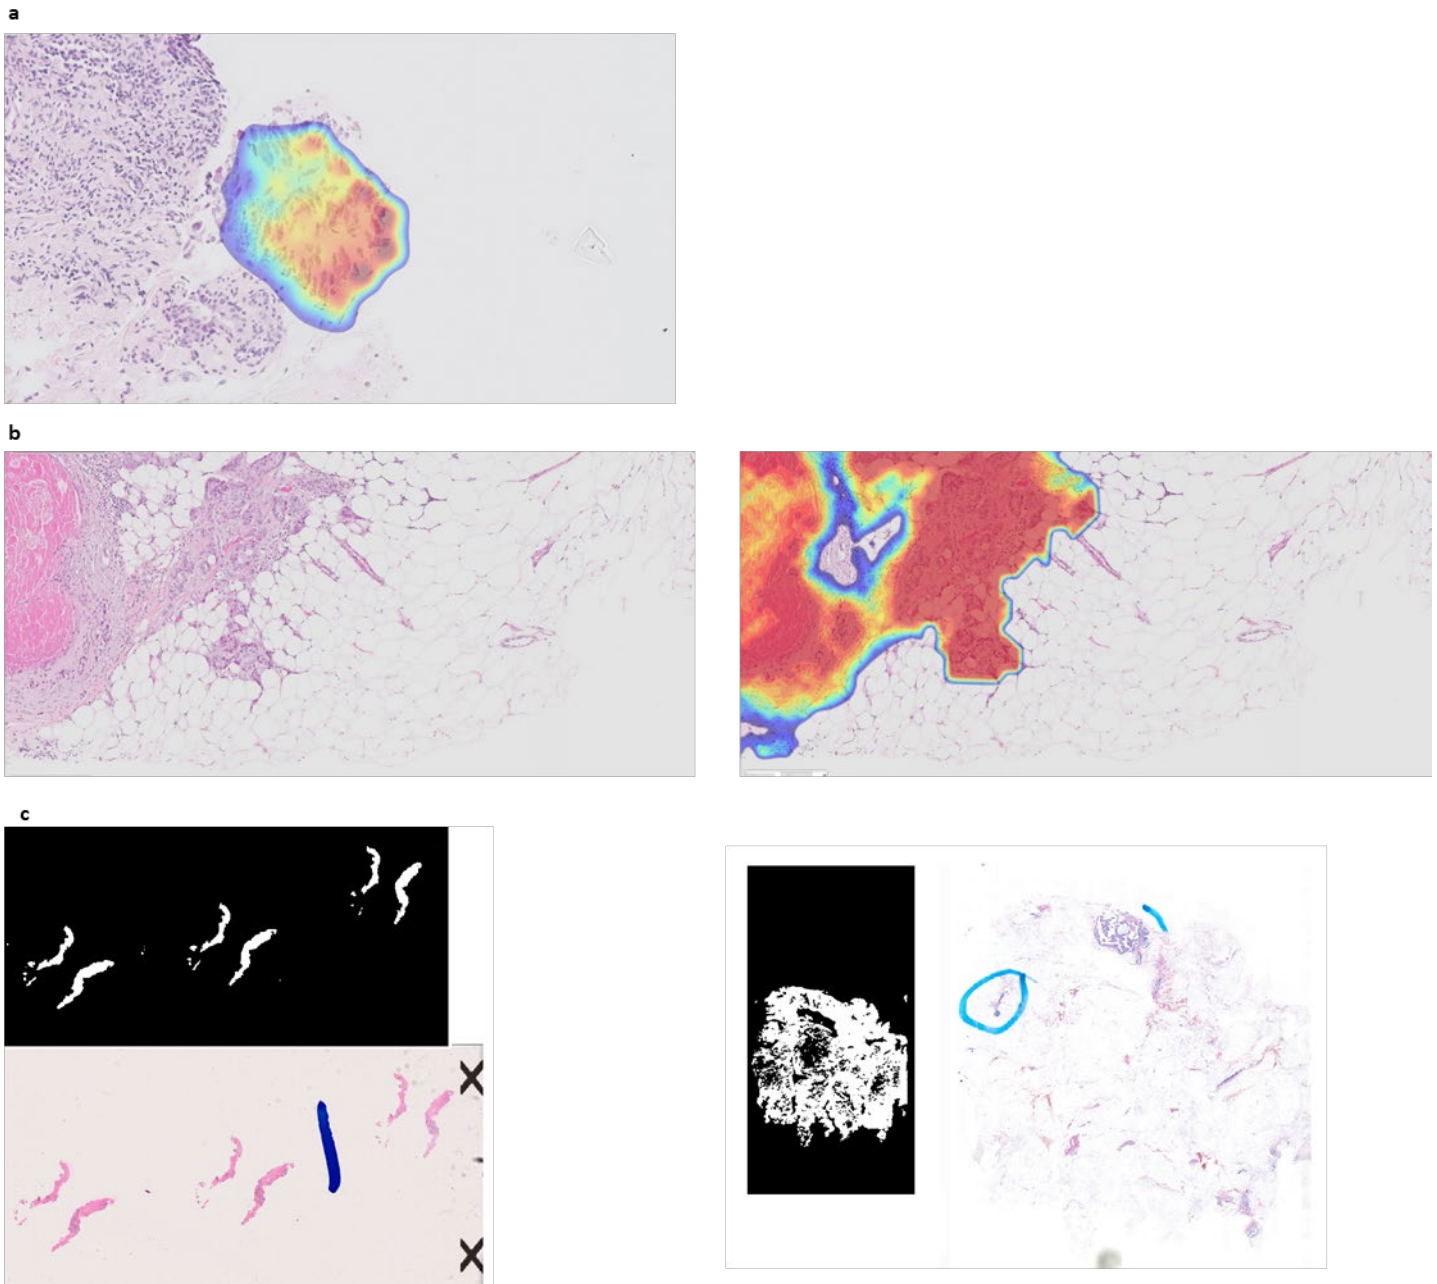

**Supplementary Figure 2** Examples of algorithm detection for problematic areas.

**a.** An image of a macrocalcification area correctly identified on the edge of a biopsy; **b.** An image of an invasive tumor area correctly detected inside a region of fat tissue (H&E --left, with invasive cancer heatmap -right, x8 magnification); **c.** Images of slides containing artifacts such as pen and bubbles and the respective tissue detection mask that indicates that these artifacts were correctly ignored by the algorithm.
